# Supplementary material
Source: PubMed Central journal article supplement (PMC4143397)
Supplement: bbug-5-264-s01.pdf [file bbug-5-264-s01.pdf]

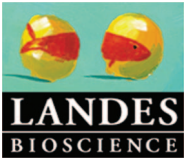

# Bioengineered Journal Publication Costs Form

For Print and Online Journals

This form is NOT our formal invoice. You may use the form as a pro-forma invoice for your purchasing department.

Volume #: \_\_\_\_\_ Issue #: \_\_\_\_\_ MS #: \_\_\_\_\_

First Author: \_\_\_\_\_ Corresponding Author: \_\_\_\_\_

MS Title: \_\_\_\_\_

Total # of pages: \_\_\_\_\_ Total # of color pages: \_\_\_\_\_ Total # of supplementary files: \_\_\_\_\_

Research funded by:  HHMI  NIH  Wellcome Trust (UK)  Other (please specify) \_\_\_\_\_

## Publication Costs

**Page charges** apply to original research papers and reports at a rate of \$100 per page or part page assessed. All pages are assessed for page charges. Color charges are assessed separately and will be added to the total amount of pages assessed.

**Color charges** apply to all pages with color figures. Standard rates for color charges are \$340 for the first printed color page and \$150 for each additional color page. Authors may choose to convert color images to grayscale for the print edition of their manuscript in order to eliminate color charges. Figures will remain in color for the online version of the manuscript if this option is selected.

**Supplementary fees** apply for any supplemental material posted with a manuscript. A flat \$100 rate for all text, figures and/or tables is assessed. Supplemental movies carry a rate of \$150 for up to five movie files and \$50 for each subsequent movie file.

## Open-Access

Authors may choose to have their manuscript made freely available online, from the first day of publication, for all scientists and students around the world to view without a subscription or by paying a pay-per-view download fee.

Prices vary based on the type of paper and the desired Creative Commons license you wish to use.

**CC-BY-NC:** Anyone may copy, distribute, transmit, or adapt the work as long as the work is attributed (properly cited). This work may not be used for commercial purposes.

**CC-BY:** Anyone may copy, distribute, transmit, adapt, or use the work for commercial and non-commercial purposes as long as the work is attributed (properly cited).

| OPEN ACCESS      | TYPE OF PAPER | FEE    |
|------------------|---------------|--------|
| CC-BY-NC license | Report        | \$750  |
|                  | Short Report  | \$500  |
|                  | Review        | \$500  |
|                  | Commentary    | \$250  |
| CC-BY license    | Report        | \$1500 |
|                  | Short Report  | \$1000 |
|                  | Review        | \$1000 |
|                  | Commentary    | \$500  |

## Reprints

To order pdf and print reprints please use separate form available here: [www.landesbioscience.com/docs/reprints.pdf](http://www.landesbioscience.com/docs/reprints.pdf)

Return this form to: Andrew Thompson, *Bioengineered*  
Landes Bioscience; 1806 Rio Grande St.; Austin TX 78701 USA  
Tel.: 512.637.6050; Fax: 512.861.2323; Email: [andrew@landesbioscience.com](mailto:andrew@landesbioscience.com)

## Publication Charges

Page Charges \$ \_\_\_\_\_

Color Charges \$ \_\_\_\_\_

Supplemental Charges \$ \_\_\_\_\_

Check here if you wish to convert color figures to black and white and eliminate the above color charges.

Open Access  CC-BY-NC  CC-BY \$ \_\_\_\_\_

**Total Publication/Open-Access Charges** \$ \_\_\_\_\_

## Billing Contact Information

Complete billing information REQUIRED for all orders

Name \_\_\_\_\_

Institution \_\_\_\_\_

Address Line 1 \_\_\_\_\_

Address Line 2 \_\_\_\_\_

City/State/Zip \_\_\_\_\_

Country \_\_\_\_\_

Phone \_\_\_\_\_

Fax \_\_\_\_\_

Email address \_\_\_\_\_

## Payment Method

Purchase Order: PO# \_\_\_\_\_  
(Please also send a copy of the PO issued by your institution)

Check (payable to Landes Bioscience)

Bank Draft  
(add \$25 USD if paying by bank transfer)

Credit Card:  Amex  Mastercard  Visa

Credit Card #: \_\_\_\_\_

Exp. Date: \_\_\_\_\_ Card Security Code: \_\_\_\_\_

Signature: \_\_\_\_\_

Name: \_\_\_\_\_ Date: \_\_\_\_\_

Signature is required. By signing this form, the author agrees to accept the responsibility for the payment of all charges described in this document.
